# Supplementary material for: Mediport use as an acceptable standard for CAR T cell infusion
Source: PubMed Central journal article supplement (PMC10642031; doi:10.3389/fimmu.2023.1239132), 2023-10-27
Supplement: Image_1.pdf [file Image_1.pdf]

Supplementary Figure 1: Survey 1 Distributed to PRWCC Medical Centers

- 1. Do you use mediports for the infusion of CAR T-cell therapy?**      Yes [ ]    No [ ]
- Do you use peripheral IVs for the infusion of CAR T-cell therapy?      Yes [ ]    No [ ]
- Do you use broviacs/hickmans for the infusion of CAR T-cell therapy?      Yes [ ]    No [ ]
- Do you use PICCs for the infusion of CAR T-cell therapy?      Yes [ ]    No [ ]

**2. Have you ever had a line infiltration when infusing CAR T-cell therapy**

- Using mediports?**      Yes [ ]    No [ ]    N/A [ ]    If yes, explain:
- Using peripheral IV?**      Yes [ ]    No [ ]    N/A [ ]    If yes, explain:

Supplemental Figure 2: Survey 2 Distributed to PRWCC Medical Centers

**Site:** \_\_\_\_\_

**Total Patients infused with Commercial CAR from Aug 2017 – September 1, 2022:** \_\_\_\_\_

| Route of Infusion | Mediport | Central Line | PICC | Peripheral IV |
|-------------------|----------|--------------|------|---------------|
| Patient Volume    |          |              |      |               |
